## Kinematics of jumping in leafhopper insects (Hemiptera, Auchenorrhyncha, Cicadellidae)

Malcolm Burrows

10.1242/jeb.013763

There was an error published in the on-line version of *J. Exp. Biol.* **210**, 3579-3589. The print version is correct.

The spacing of some of the data in Table 2 was incorrect. The correctly laid out Table is presented below.

Table 2. *Jumping performance of Cicadellids*

|                      | <i>N</i> | Body mass (mg) | Body length (mm) | Time to take off (ms) | Take off velocity (m s <sup>-1</sup> ) | Take-off angle (degrees) | Body angle at take-off (degrees) | Acceleration (m s <sup>-2</sup> ) | <i>g</i> force | Energy (μJ) | Power (mW) | Force (mN) |
|----------------------|----------|----------------|------------------|-----------------------|----------------------------------------|--------------------------|----------------------------------|-----------------------------------|----------------|-------------|------------|------------|
| <i>Empoasca</i>      |          |                |                  |                       |                                        |                          |                                  |                                   |                |             |            |            |
| Mean                 | 7        | 0.86±0.07      | 3.5±0.03         | 4.7±0.10              | 1.1±0.11                               |                          |                                  | 253                               | 26             | 0.6         | 0.1        | 0.2        |
| Best                 |          |                |                  | 4                     | 1.6                                    |                          |                                  | 400                               | 41             | 1.0         | 0.3        | 0.3        |
| <i>Aphrodes</i>      |          |                |                  |                       |                                        |                          |                                  |                                   |                |             |            |            |
| Mean                 | 43       | 18.4±1.30      | 8.5±0.22         | 4.4±0.18              | 2.5±0.09                               | 37.1±4.40                | 36.7±5.0                         | 568                               | 58             | 58          | 13         | 11         |
| Best                 |          |                |                  | 2.75                  | 2.9                                    |                          |                                  | 1055                              | 108            | 77          | 28         | 19         |
| <i>Cicadella</i>     |          |                |                  |                       |                                        |                          |                                  |                                   |                |             |            |            |
| Female               |          |                |                  |                       |                                        |                          |                                  |                                   |                |             |            |            |
| Mean                 | 10       | 19±1.10        | 9.2±0.33         | 6.4±0.21              | 1.2±0.13                               | 34.3±5.90                | 26.7±5.20                        | 188                               | 19             | 14          | 2          | 4          |
| Best                 |          |                |                  | 5                     | 1.6                                    |                          |                                  | 320                               | 33             | 24          | 5          | 6          |
| Male                 |          |                |                  |                       |                                        |                          |                                  |                                   |                |             |            |            |
| Mean                 | 10       | 10.9±0.50      | 6.4±0.16         | 6.4±0.21              | 1.2±0.13                               | 34.3±5.90                | 26.7±5.20                        | 188                               | 19             | 8           | 1          | 2          |
| Best                 |          |                |                  | 5                     | 1.6                                    |                          |                                  | 315                               | 33             | 14          | 3          | 3          |
| <i>Graphocephala</i> |          |                |                  |                       |                                        |                          |                                  |                                   |                |             |            |            |
| Mean                 | 16       | 13             | 9.0              | 5.6±0.25              | 1.6±0.07                               | 29.5±3.60                | 15.7±2.40                        | 285                               | 29             | 17          | 3          | 4          |
| Best                 |          |                |                  | 4.5                   | 1.85                                   |                          |                                  | 411                               | 42             | 22          | 5          | 5          |
| <i>Iassus</i> Nymphs |          |                |                  |                       |                                        |                          |                                  |                                   |                |             |            |            |
| Best                 | 4        |                | 4.3              | 2.5                   | 2                                      | 45                       | 32                               | 800                               | 82             | 8           | 3.2        | 3.2        |

Values are means ± s.e.m.

We apologise for any inconvenience this error has caused.
